# Supplementary material for: Competition between Jagged-Notch and Endothelin1 Signaling Selectively Restricts Cartilage Formation in the Zebrafish Upper Face
Source: PLoS Genet. 2016 Apr 8;12(4):e1005967. doi: 10.1371/journal.pgen.1005967 (PMC4825933; doi:10.1371/journal.pgen.1005967)
Supplement: S8 Table — (XLSX) [file pgen.1005967.s008.xlsx]

## Sheet: S8 - in situ probes
Supplementary Table S8. In situ probe construction.			restriction enzyme used for linearization
				RNA polymerase
gene	forward cloning primer (5'-3')	reverse cloning primer (5'-3')
barx1	CATAACCACTTAGTTCTGAAGGCAGAC	TCGGGATAATCTATCACGTTTATT	EcoRV	Sp6
notch1a	AGCATGATGTGAACGAGTGC	CGGAAGTCGTTGATGAGCTG	NotI	Sp6
notch1b	ACAGAAGGGGGAGACCAGTT	CTAAACAGGTGGCGTCGTTT	EcoRV	Sp6
notch3	AGACCGGTGACCACACCTAC	AAGCCGTTGACCATATCTCG	NotI	Sp6
prrx1a	GCCACACTACCAAACCGACT	GGCTTTCAGTCTCAGGTTGG	EcoRV	Sp6
prrx1b	CCTGCAAGCCAAAAAGAACT	GTTTCTGTGGGCAGCATTTT	EcoRV	Sp6
